# Supplementary material
Source: PubMed Central journal article supplement (PMC5084888)

**Supplementary Table 1.** Comparison of clinical and electrocardiographic characteristics of patients with and without late potentials on SAECG

| Characteristic                                           | Number of patients<br>(N = 358) | No late potentials<br>(N=270) | Yes late potentials<br>(N=88) |
|----------------------------------------------------------|---------------------------------|-------------------------------|-------------------------------|
| <b>Demographic and Clinical Characteristics</b>          |                                 |                               |                               |
| <b>Mean age (SD), years</b>                              | <b>358</b>                      | <b>53 (13)</b>                | <b>60 (14)</b>                |
| <b>Men, n (%)</b>                                        | <b>358</b>                      | <b>151 (56)</b>               | <b>61 (69)</b>                |
| <b>African American, n (%)</b>                           | <b>358</b>                      | <b>210 (78)</b>               | <b>52 (59)</b>                |
| Mean BMI (SD), kg/m <sup>2</sup>                         | 357                             | 29.5 (7.8)                    | 29.3 (8.1)                    |
| <b>Diabetes, n (%)</b>                                   | 358                             | 155 (57)                      | 52 (59)                       |
| Hypertension, n (%)                                      | 358                             | 270 (100)                     | 88 (100)                      |
| Coronary artery disease, n (%)                           | 358                             | 92 (34)                       | 40 (45.5)                     |
| Ever smoker, n (%)                                       | 358                             | 159 (59)                      | 61 (69)                       |
| Beta-blocker, n(%)                                       | 322                             | 167 (69)                      | 59 (73)                       |
| ACE inhibitor, n (%)                                     | 322                             | 81 (34)                       | 29 (36)                       |
| Angiotensin-receptor blocker, n (%)                      | 322                             | 25 (10)                       | 8 (10)                        |
| Calcium channel blocker, n(%)                            | 322                             | 147 (61)                      | 49 (60)                       |
| 3-month averaged calcium (SD), mg/dL                     | 355                             | 8.6 (0.6)                     | 8.7 (0.6)                     |
| 3-month averaged potassium (SD), mEq/L                   | 355                             | 4.4 (0.5)                     | 4.3 (0.4)                     |
| 3-month averaged magnesium (SD), mg/dL                   | 334                             | 2.2 (6.1)                     | 1.7 (0.3)                     |
| Dialysate calcium (%), mEq/L*                            | 349                             |                               |                               |
| 2                                                        |                                 | 117 (45)                      | 28 (32)                       |
| 2.25                                                     |                                 | 12 (5)                        | 3 (3)                         |
| 2.5                                                      |                                 | 131 (50)                      | 56 (64)                       |
| 3                                                        |                                 | 2 (1)                         | 0                             |
| Dialysate potassium (%), mEq/L*                          | 350                             |                               |                               |
| 1                                                        |                                 | 2 (1)                         | 2 (2)                         |
| 2                                                        |                                 | 222 (84)                      | 72 (83)                       |
| 3                                                        |                                 | 39 (15)                       | 13 (15)                       |
| 3-month averaged intradialytic weight change (SD), kg    | 349                             | 2.3 (0.9)                     | 2.3 (0.8)                     |
| <b>Left ventricular function</b>                         |                                 |                               |                               |
| Mean left ventricular ejection fraction (SD)             | 351                             | 65.9 (12.3)                   | 64.5 (11.1)                   |
| Mean left ventricular mass index (SD),g/m <sup>2.7</sup> | 350                             | 66.5 (23.1)                   | 66.8 (19.8)                   |
| <b>12-lead ECG characteristics</b>                       |                                 |                               |                               |
| Mean heart rate (SD), bpm                                | 306                             | 71.7 (11.4)                   | 70.7 (10.2)                   |
| Median heart rate variance (IQR), ms                     | 306                             | 363 (122, 1086)               | 341 (137, 1093)               |
| <b>Mean QRS duration (SD), ms</b>                        | <b>358</b>                      | <b>95.5 (13.8)</b>            | <b>115.5 (22.9)</b>           |
| <b>Complete bundle branch block, n (%)</b>               | <b>358</b>                      | <b>8 (3)</b>                  | <b>20 (23)</b>                |
| Mean spatial QRS-T angle (SD)                            | 358                             | 89.7 (46.7)                   | 92.4 (42.4)                   |

**Supplementary Table 2.** Comparison of baseline clinical and electrocardiographic characteristics of hemodialysis participants with and without outcome

| Characteristics                                  | All-cause mortality |                 |
|--------------------------------------------------|---------------------|-----------------|
|                                                  | Yes<br>(N = 77)     | No<br>(N = 281) |
| <b>Demographic and clinical characteristics</b>  |                     |                 |
| Mean age (SD), years                             | 59 (13)             | 54 (13)         |
| Men, n (%)                                       | 43 (56)             | 169 (60)        |
| African American, n (%)                          | 52 (68)             | 210 (75)        |
| Mean BMI (SD), kg/m <sup>2</sup>                 | 27.8 (7.9)          | 29.9 (8)        |
| Diabetes, n (%)                                  | 49 (64)             | 158 (56)        |
| Hypertension, n (%)                              | 77 (100)            | 281 (100)       |
| Coronary artery disease, n (%)                   | 34 (44)             | 98 (35)         |
| Family history of CHD, n (%)                     | 31 (40)             | 122 (43)        |
| Family history of sudden death, n (%)            | 9 (12)              | 26 (9)          |
| Ever smoke, n (%)                                | 51 (66)             | 169 (60)        |
| Ever alcohol use, n (%)                          | 58 (77)             | 229 (82)        |
| Beta-blocker, n (%)                              | 42 (64)             | 184 (72)        |
| ACE inhibitor, n (%)                             | 32 (49)             | 78 (31)         |
| Angiotensin-receptor blocker, n (%)              | 6 (9)               | 27 (11)         |
| Calcium channel blocker, n(%)                    | 29 (44)             | 167 (65)        |
| 3-month averaged calcium (SD), mg/dL             | 8.5 (0.7)           | 8.7 (0.6)       |
| 3-month averaged potassium (SD), mEq/L           | 4.3 (0.6)           | 4.4 (0.5)       |
| 3-month averaged magnesium (SD) , mg/dL          | 1.7 (0.2)           | 2.1 (6.0)       |
| 3-month averaged albumin (SD), g/dL              | 3.4 (0.5)           | 3.7 (0.4)       |
| 3-month averaged creatinine (SD), mg/dL          | 6.2 (2.1)           | 7.3 (2.6)       |
| Mean non-dialysis seated systolic BP (SD), mmHg  | 137.3 (20.8)        | 137.3 (25.6)    |
| Mean non-dialysis seated diastolic BP (SD), mmHg | 73.7 (13.7)         | 75.1 (15.1)     |
| Dialysate calcium (%), mEq/L                     |                     |                 |
| 2                                                | 30 (40)             | 115 (42)        |
| 2.25                                             | 5 (6)               | 10 (3)          |
| 2.5                                              | 40 (53)             | 147 (54)        |
| 3                                                | 1 (1)               | 1 (1)           |
| Dialysate potassium (%), mEq/L                   |                     |                 |
| 1                                                | 0 (0)               | 4 (2)           |
| 2                                                | 60 (79)             | 234 (85)        |
| 3                                                | 16 (21)             | 36 (13)         |

**Left ventricular function by echocardiogram**

|                                                           |             |             |
|-----------------------------------------------------------|-------------|-------------|
| Mean left ventricular ejection fraction (SD)              | 62.9 (12.4) | 66.2 (11.9) |
| Mean left ventricular mass index (SD), g/m <sup>2.7</sup> | 67.8 (20.9) | 66.3 (22.7) |
| LVH, n(%)                                                 | 57 (77)     | 205 (74)    |
| Mean left ventricular end diastolic diameter (SD), cm     | 5.4 (0.7)   | 5.3 (0.7)   |
| Mean left ventricular end systolic diameter (SD), cm      | 3.3 (0.9)   | 3.2 (0.8)   |

**12-lead ECG characteristics**

|                                         |                 |                 |
|-----------------------------------------|-----------------|-----------------|
| Mean heart rate (SD), bpm               | 71.2 (10.8)     | 71.5 (10.8)     |
| Median heart rate variability (IQR), ms | 376 (114, 1076) | 356 (127, 1098) |
| Mean QTc (SD), ms                       | 483.2 (39.5)    | 484.9 (44.7)    |
| Mean QRS duration (SD), ms              | 98.4 (17.3)     | 101.0 (18.9)    |
| Complete bundle branch block, n (%)     | 6 (8)           | 22 (8)          |
| Mean spatial QRS-T angle (SD)           | 99.7 (41.3)     | 87.8 (46.5)     |

**Signal averaged ECG (SAECG) characteristics**

|                                        |                |                |
|----------------------------------------|----------------|----------------|
| Median filtered QRS duration (IQR), ms | 112 (106, 122) | 113 (106, 124) |
| Median LAS40 (IQR)                     | 28 (20, 36)    | 29 (20, 37)    |
| Median RMS40 (IQR)                     | 46 (26, 59)    | 36 (23, 56)    |
| Median noise (IQR), $\mu$ V            | 0.3 (0.2, 0.4) | 0.3 (0.2, 0.4) |
| Late potentials on SAECG, n (%)        | 19 (25)        | 69 (25)        |

SD=standard deviation. BMI=Body mass index. CVD=cardiovascular disease. CHD=coronary heart disease. LVH=left ventricular hypertrophy. LAS40=duration of the low-amplitude signals (<40 mV) in the terminal QRS portion. RMS40=root-mean-square voltage of the last 40

**Supplementary Table 3.** Sensitivity analysis examining the association of spatial QRS-T angle with all-cause mortality, cardiovascular mortality, and sudden cardiac death within 1 year using Cox proportional hazards model

| Model                                       | Per 10° of spatial QRS-T angle |      | Spatial QRS-T angle ≥ 75° |      |
|---------------------------------------------|--------------------------------|------|---------------------------|------|
|                                             | HR (95% CI)                    | P    | HR (95% CI)               | P    |
| <b>All-cause mortality<sup>†</sup></b>      |                                |      |                           |      |
| Unadjusted                                  | 1.08 (1.00, 1.17)              | 0.06 | 1.95 (0.86, 4.44)         | 0.11 |
| Model 1*                                    | 1.08 (1.00, 1.18)              | 0.05 | 2.08 (0.91, 4.77)         | 0.08 |
| Model 2**                                   | 1.09 (1.00, 1.19)              | 0.04 | 2.21 (0.93, 5.23)         | 0.07 |
| <b>Cardiovascular mortality<sup>†</sup></b> |                                |      |                           |      |
| Unadjusted                                  | 1.12 (0.99, 1.26)              | 0.07 | 2.82 (0.78, 10.15)        | 0.11 |
| Model 1*                                    | 1.12 (0.99, 1.26)              | 0.07 | 2.94 (0.81, 10.69)        | 0.10 |
| Model 2**                                   | 1.13 (0.99, 1.28)              | 0.06 | 3.07 (0.80, 11.74)        | 0.10 |
| <b>Sudden cardiac death<sup>†</sup></b>     |                                |      |                           |      |
| Unadjusted                                  | 1.13 (0.96, 1.32)              | 0.14 | 2.47 (0.50, 12.25)        | 0.27 |
| Model 1*                                    | 1.12 (0.95, 1.30)              | 0.17 | 2.51 (0.50, 12.69)        | 0.27 |
| Model 2**                                   | 1.15 (0.97, 1.36)              | 0.12 | 3.00 (0.53, 17.09)        | 0.22 |

<sup>†</sup> There were 29 deaths, of which, 14 were due to cardiovascular causes. Of the 14 deaths, 8 were sudden cardiac deaths.

\* Model 1 includes the main exposure (either continuous QRS-T angle or dichotomized QRS-T angle), age, sex, race

\*\* Model 2 includes variables in Model 1, beta-blocker medication, coronary artery disease, LVMI

**Supplementary Table 4.** Association of late potential on signal averaged electrocardiogram (SAECG) with all-cause mortality, cardiovascular mortality, and sudden cardiac death among incident hemodialysis

| Model                           | Late potential on SAECG |      |
|---------------------------------|-------------------------|------|
|                                 | HR (95% CI)             | P    |
| <b>All-cause mortality</b>      |                         |      |
| Unadjusted                      | 1.15 (0.66, 2.00)       | 0.63 |
| Model 1*                        | 0.99 (0.56, 1.75)       | 0.98 |
| Model 2**                       | 0.99 (0.56, 1.75)       | 0.98 |
| <b>Cardiovascular mortality</b> |                         |      |
| Unadjusted                      | 0.70 (0.28, 1.76)       | 0.45 |
| Model 1*                        | 0.66 (0.26, 1.72)       | 0.40 |
| Model 2**                       | 0.67 (0.26, 1.73)       | 0.41 |
| <b>Sudden cardiac death</b>     |                         |      |
| Unadjusted                      | 1.03 (0.29, 3.67)       | 0.96 |
| Model 1*                        | 0.96 (0.26, 3.52)       | 0.96 |
| Model 2**                       | 1.12 (0.30, 4.23)       | 0.86 |

\* Model 1 includes the main exposure (Late potential on SAECG), age, sex, race

\*\* Model 2 includes variables in Model 1, beta-blocker medication, coronary artery disease, LVMI

**Supplementary Table 5.** Sensitivity analysis examining the association of spatial QRS-T angle with all-cause mortality, cardiovascular mortality, and sudden cardiac death using Cox proportional hazards model in patients without total bundle branch block

| Model                           | Per 10° of spatial QRS-T angle |      |                 | Spatial QRS-T angle ≥ 75° |         |                 |
|---------------------------------|--------------------------------|------|-----------------|---------------------------|---------|-----------------|
|                                 | HR (95% CI)                    | P    | P interaction** | HR (95% CI)               | P       | P interaction** |
| <b>All-cause mortality</b>      |                                |      |                 |                           |         |                 |
| Unadjusted                      | 1.06 (1.01, 1.12)              | 0.03 | 0.26            | 2.36 (1.39, 3.99)         | 0.001   | 0.08            |
| Model 1*                        | 1.06 (1.01, 1.12)              | 0.03 |                 | 2.68 (1.54, 4.66)         | < 0.001 |                 |
| <b>Cardiovascular mortality</b> |                                |      |                 |                           |         |                 |
| Unadjusted                      | 1.09 (1.01, 1.18)              | 0.03 | 0.11            | 3.16 (1.37, 7.29)         | 0.01    | 0.09            |
| Model 1*                        | 1.10 (1.02, 1.19)              | 0.02 |                 | 3.68 (1.53, 8.80)         | 0.003   |                 |
| <b>Sudden cardiac death</b>     |                                |      |                 |                           |         |                 |
| Unadjusted                      | 1.08 (0.97, 1.21)              | 0.18 | 0.99            | 3.42 (0.97, 12.14)        | 0.06    | 0.99            |
| Model 1*                        | 1.11 (0.98, 1.25)              | 0.11 |                 | 4.52 (1.17, 17.40)        | 0.03    |                 |

\* Model 1 includes the main exposure, age, sex, race, beta-blocker medication, coronary artery disease, LVMI

\*\* Statistical interaction between the main exposure (either continuous QRS-T angle or dichotomized QRS-T angle) and total bundle branch block in model 1 that included the main exposure, age, sex, race, beta-blocker medication, coronary artery disease, LVMI, and total bundle branch block

**Supplementary Table 6.** Sensitivity analysis examining the association of spatial QRS-T angle with all-cause mortality, cardiovascular mortality, and sudden cardiac death using Cox proportional hazards model excluding patients with QRS duration  $\geq 120$  ms

| Model                           | Per 10° of spatial QRS-T angle |       | Spatial QRS-T angle $\geq 75^\circ$ |         |
|---------------------------------|--------------------------------|-------|-------------------------------------|---------|
|                                 | HR (95% CI)                    | P     | HR (95% CI)                         | P       |
| <b>All-cause mortality</b>      |                                |       |                                     |         |
| Unadjusted                      | 1.08 (1.02, 1.14)              | 0.004 | 2.73 (1.60, 4.67)                   | < 0.001 |
| Model 1*                        | 1.09 (1.03, 1.15)              | 0.003 | 3.15 (1.80, 5.53)                   | < 0.001 |
| <b>Cardiovascular mortality</b> |                                |       |                                     |         |
| Unadjusted                      | 1.10 (1.02, 1.19)              | 0.01  | 3.45 (1.50, 7.95)                   | 0.004   |
| Model 1*                        | 1.12 (1.03, 1.21)              | 0.01  | 4.07 (1.70, 9.75)                   | 0.002   |
| <b>Sudden cardiac death</b>     |                                |       |                                     |         |
| Unadjusted                      | 1.09 (0.98, 1.22)              | 0.12  | 3.73 (1.05, 13.23)                  | 0.04    |
| Model 1*                        | 1.12 (0.99, 1.26)              | 0.07  | 4.78 (1.24, 18.38)                  | 0.02    |

\* Model 1 includes the main exposure, age, sex, race, beta-blocker medication, coronary artery disease, LVMI

**Supplementary Table 7.** Sensitivity analysis examining the association of spatial QRS-T angle with all-cause mortality, cardiovascular mortality, sudden cardiac death, after additionally adjustment for serum and dialysate electrolytes, intradialytic weight change, or albumin

| Model                           | Per 10° of spatial QRS-T angle |                   | Spatial QRS-T angle ≥ 75° |                   |
|---------------------------------|--------------------------------|-------------------|---------------------------|-------------------|
|                                 | HR (95% CI)                    | P                 | HR (95% CI)               | P                 |
| <b>All-cause mortality</b>      |                                |                   |                           |                   |
| Model 1 <sup>1</sup>            | 1.05 (1.00, 1.11)              | 0.06              | 2.30 (1.36, 3.90)         | 0.002             |
| Model 2 <sup>2</sup>            | 1.06 (1.00, 1.11)              | 0.04              | 2.39 (1.41, 4.07)         | 0.001             |
| Model 3 <sup>3</sup>            | 1.06 (1.00, 1.11)              | 0.04              | 2.41 (1.41, 4.14)         | 0.001             |
| Model 4 <sup>4</sup>            | 1.05 (1.00, 1.11)              | 0.06              | 2.36 (1.38, 4.02)         | 0.002             |
| Model 5 <sup>5</sup>            | 1.05 (1.00, 1.11)              | 0.05 <sup>†</sup> | 2.40 (1.41, 4.08)         | 0.001             |
| Model 6 <sup>6</sup>            | 1.05 (1.00, 1.11)              | 0.05              | 2.38 (1.40, 4.04)         | 0.001             |
| Model 7 <sup>7</sup>            | 1.06 (1.00, 1.11)              | 0.04              | 2.30 (1.36, 3.91)         | 0.002             |
| Model 8 <sup>8</sup>            | 1.07 (1.01, 1.22)              | 0.02              | 2.63 (1.54, 4.50)         | 0.001             |
| <b>Cardiovascular mortality</b> |                                |                   |                           |                   |
| Model 1 <sup>1</sup>            | 1.08 (1.00, 1.17)              | 0.05              | 2.86 (1.26, 6.49)         | 0.01              |
| Model 2 <sup>2</sup>            | 1.09 (1.00, 1.17)              | 0.04              | 3.00 (1.32, 6.85)         | 0.01              |
| Model 3 <sup>3</sup>            | 1.09 (1.00, 1.18)              | 0.04              | 3.10 (1.30, 7.38)         | 0.01              |
| Model 4 <sup>4</sup>            | 1.08 (1.00, 1.16)              | 0.06              | 2.84 (1.24, 6.47)         | 0.01              |
| Model 5 <sup>5</sup>            | 1.08 (1.00, 1.17)              | 0.04              | 3.02 (1.32, 6.91)         | 0.01              |
| Model 6 <sup>6</sup>            | 1.08 (1.00, 1.17)              | 0.05              | 2.91 (1.27, 6.67)         | 0.01              |
| Model 7 <sup>7</sup>            | 1.08 (1.00, 1.17)              | 0.05              | 2.83 (1.24, 6.45)         | 0.01              |
| Model 8 <sup>8</sup>            | 1.09 (1.02, 1.19)              | 0.02              | 3.48 (1.50, 8.10)         | 0.004             |
| <b>Sudden cardiac death</b>     |                                |                   |                           |                   |
| Model 1 <sup>1</sup>            | 1.11 (0.98, 1.25)              | 0.11              | 4.37 (1.13, 16.93)        | 0.03              |
| Model 2 <sup>2</sup>            | 1.11 (0.98, 1.25)              | 0.11              | 4.46 (1.16, 17.18)        | 0.03              |
| Model 3 <sup>3</sup>            | 1.11 (0.98, 1.26)              | 0.09              | 4.89 (1.15, 20.73)        | 0.03              |
| Model 4 <sup>4</sup>            | 1.10 (0.98, 1.25)              | 0.12              | 4.26 (1.10, 16.48)        | 0.04              |
| Model 5 <sup>5</sup>            | 1.11 (0.98, 1.25)              | 0.10              | 4.50 (1.17, 17.31)        | 0.03              |
| Model 6 <sup>6</sup>            | 1.09 (0.96, 1.24)              | 0.17              | 4.04 (1.03, 15.82)        | 0.05 <sup>†</sup> |
| Model 7 <sup>7</sup>            | 1.11 (0.98, 1.26)              | 0.09              | 4.35 (1.14, 16.67)        | 0.03              |
| Model 8 <sup>8</sup>            | 1.11 (0.98, 1.26)              | 0.11              | 4.51 (1.15, 17.73)        | 0.03              |

<sup>†</sup> P < 0.05

<sup>1</sup> Model 1 includes the main exposure (either continuous QRS-T angle or dichotomized QRS-T angle), age, sex, race, beta-blocker medication, coronary artery disease, LVMI, serum calcium

<sup>2</sup> Model 2 includes the main exposure (either continuous QRS-T angle or dichotomized QRS-T angle), age, sex, race, beta-blocker medication, coronary artery disease, LVMI, serum potassium

<sup>3</sup> Model 3 includes the main exposure (either continuous QRS-T angle or dichotomized QRS-T angle), age, sex, race, beta-blocker medication, coronary artery disease, LVMI, serum magnesium

<sup>4</sup> Model 4 includes the main exposure (either continuous QRS-T angle or dichotomized QRS-T angle), age, sex, race, beta-blocker medication, coronary artery disease, LVMI, dialysate calcium

<sup>5</sup> Model 5 includes the main exposure (either continuous QRS-T angle or dichotomized QRS-T angle), age, sex, race, beta-blocker medication, coronary artery disease, LVMI, dialysate potassium

<sup>6</sup> Model 6 includes the main exposure (either continuous QRS-T angle or dichotomized QRS-T angle), age, sex, race, beta-blocker medication, coronary artery disease, LVMI, intradialytic weight change

<sup>7</sup> Model 7 includes the main exposure (either continuous QRS-T angle or dichotomized QRS-T angle), age, sex, race, beta-blocker medication, coronary artery disease, LVMI, albumin

<sup>8</sup> Model 8 includes the main exposure (either continuous QRS-T angle or dichotomized QRS-T angle), age, sex, race, beta-blocker medication, coronary artery disease, LVMI, QRS duration



**Supplementary Table 8.** Association of traditional ECG measures with all-cause mortality, cardiovascular mortality, and sudden cardiac death

|                               | All-cause mortality |      | Cardiovascular mortality |      | Sudden cardiac death |      |
|-------------------------------|---------------------|------|--------------------------|------|----------------------|------|
|                               | HR (95% CI)         | P    | HR (95% CI)              | P    | HR (95% CI)          | P    |
| <b>QRS duration*</b>          |                     |      |                          |      |                      |      |
| Per 10 ms increase            | 0.81 (0.68, 0.98)   | 0.03 | 0.71 (0.53, 0.94)        | 0.02 | 1.01 (0.67, 1.53)    | 0.94 |
| <b>Heart rate<sup>†</sup></b> |                     |      |                          |      |                      |      |
| Per 10 bpm increase           | 1.16 (0.89, 1.50)   | 0.27 | 1.20 (0.84, 1.73)        | 0.32 | 1.14 (0.67, 1.93)    | 0.64 |
| <b>LVH by ECG<sup>‡</sup></b> |                     |      |                          |      |                      |      |
| Absent (n=308)                | 1.00 (ref)          |      | 1.00 (ref)               |      | 1.00 (ref)           |      |
| Present (n=50)                | 1.06 (0.55, 2.04)   | 0.85 | 0.88 (0.30, 2.63)        | 0.82 | 3.06 (0.78, 11.99)   | 0.11 |

\*Models include the main exposure, age, sex, race, beta-blocker medication, coronary artery disease

<sup>†</sup> Models include the main exposure, age, sex, race, beta-blocker medication, coronary artery disease, LVMI

<sup>‡</sup> Models include the main exposure, age, sex, race, beta-blocker medication, coronary artery disease

## Supplemental Figures

**Supplementary Figure 1.** Measurement of mean QRS-T angle. **A.** Raw unfiltered averaged ECG signal in X, Y, and Z leads. **B.**

Reconstructed averaged vectorcardiographic QRS and T loops with detected spatial mean QRS vector and spatial peak T vector.

Spatial QRS-T angle is measured as an angle between spatial mean QRS vector and spatial peak T vector.

Supplementary Figure 1.

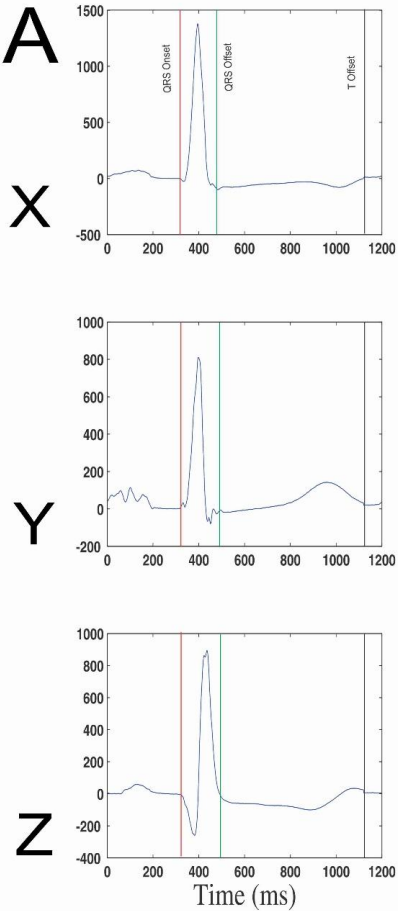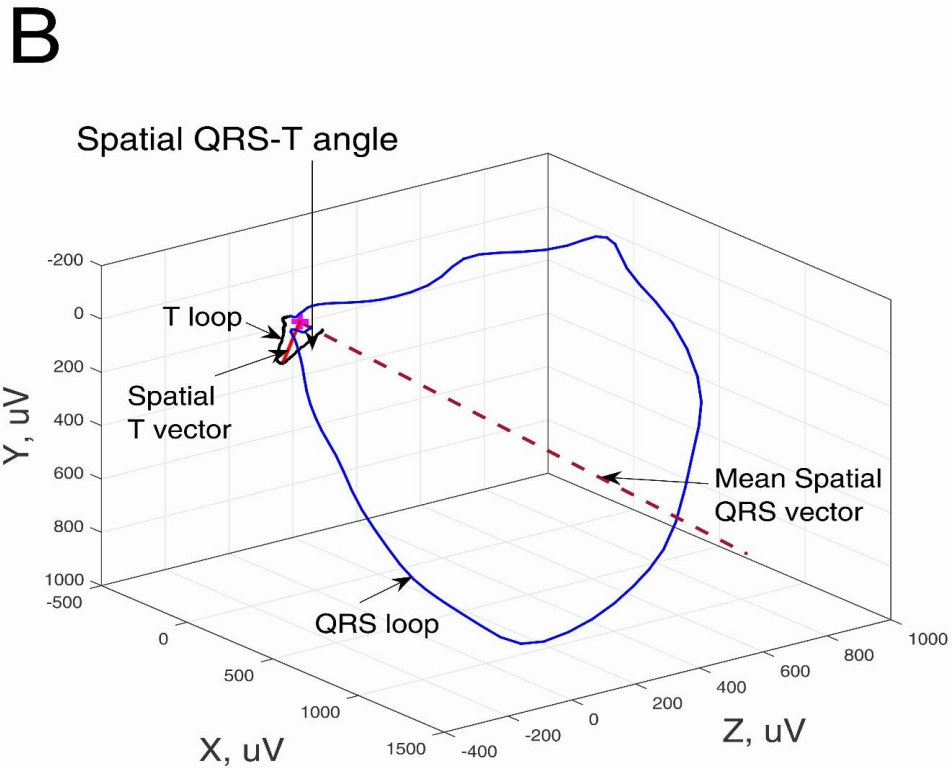

Supplement: ASN.2015080916SupplementaryData.pdf [file ASN.2015080916SupplementaryData.pdf]
